# Supplementary material
Source: PubMed Central journal article supplement (PMC3648001)
Supplement: IAI.00915-12_zii999090131so1.pdf [file IAI.00915-12_zii999090131so1.pdf]

Table S1. The list of proteins detected from excised bands by LC-MS/MS analysis.

| Excised band | Strain  |         | Total plot score <sup>1</sup> | %Cov <sup>2</sup> | Accession number      | Annotation                                                | Species                                   |                       |
|--------------|---------|---------|-------------------------------|-------------------|-----------------------|-----------------------------------------------------------|-------------------------------------------|-----------------------|
| A            | CPBF6HA | 1       | 38.87                         | 30.94972          | XM_647944             | CPBF6 96.t00007 AAFB01000344                              | <i>E. histolytica</i>                     |                       |
|              |         | 2       | 18.5                          | 21.64502          | TRYP_PIG (P00761)     | Trypsin precursor (EC 3.4.21.4)                           | PIG                                       |                       |
|              |         | 3       | 5.24                          | 2                 | XM_647892             | Pyruvate:ferredoxin oxidoreductase 98.t00023 AAFB01000352 | <i>E. histolytica</i>                     |                       |
|              |         | 4       | 4                             | 10.28037          | CAS1_BOVIN (P02662)   | Alpha-S1-casein precursor                                 | BOVIN                                     |                       |
|              |         | 5       | 2.02                          | 1.866252          | K2C1_HUMAN (P04264)   | Keratin, type II cytoskeletal 1                           | HUMAN                                     |                       |
|              | CPBF8HA | 1       | 59.86                         | 35.06637          | XM_647807, 101.m00123 | CPBF8 101.t00012 AAFB01000362                             | <i>E. histolytica</i>                     |                       |
|              |         | 2       | 17.28                         | 26.40693          | TRYP_PIG (P00761)     | Trypsin precursor (EC 3.4.21.4)                           | PIG                                       |                       |
|              |         | 3       | 5.53                          | 5.287714          | K2C1_HUMAN (P04264)   | Keratin, type II cytoskeletal 1                           | HUMAN                                     |                       |
|              |         | 4       | 2.06                          | 5.607476          | CAS1_BOVIN (P02662)   | Alpha-S1-casein precursor                                 | BOVIN                                     |                       |
|              | HA      | 1       | 11.64                         | 21.64502          | TRYP_PIG (P00761)     | Trypsin precursor (EC 3.4.21.4)                           | PIG                                       |                       |
|              |         | 2       | 7.04                          | 3.732504          | K2C1_HUMAN (P04264)   | Keratin, type II cytoskeletal 1                           | HUMAN                                     |                       |
|              |         | 3       | 3.4                           | 10.28037          | CAS1_BOVIN (P02662)   | Alpha-S1-casein precursor                                 | BOVIN                                     |                       |
| B            | CPBF6HA | 1       | 13.05                         | 7.63583           | XM_647289             | $\gamma$ -Amylase 120.t00008 AAFB01000417                 | <i>E. histolytica</i>                     |                       |
|              |         | 2       | 11.84                         | 10.73095          | K2C1_HUMAN (P04264)   | Keratin, type II cytoskeletal 1                           | HUMAN                                     |                       |
|              |         | 3       | 9.99                          | 17.31602          | TRYP_PIG (P00761)     | Trypsin precursor (EC 3.4.21.4)                           | PIG                                       |                       |
|              |         | CPBF8HA | 1                             | 13.59             | 27.70563              | TRYP_PIG (P00761)                                         | Trypsin precursor (EC 3.4.21.4)           | PIG                   |
|              |         |         | 2                             | 13.14             | 7.853983              | XM_647807, 101.m00123                                     | CPBF8 101.t00012 AAFB01000362             | <i>E. histolytica</i> |
|              |         |         | 3                             | 8.67              | 7.153966              | K2C1_HUMAN (P04264)                                       | Keratin, type II cytoskeletal 1           | HUMAN                 |
|              |         |         | 4                             | 2.92              | 4.672897              | CAS1_BOVIN (P02662)                                       | Alpha-S1-casein precursor                 | BOVIN                 |
|              |         | HA      | 1                             | 16.07             | 17.57387              | K2C1_HUMAN (P04264)                                       | Keratin, type II cytoskeletal 1           | HUMAN                 |
|              |         |         | 2                             | 11.17             | 20.77922              | TRYP_PIG (P00761)                                         | Trypsin precursor (EC 3.4.21.4)           | PIG                   |
|              |         |         | 3                             | 7.62              | 7.704655              | K1C9_HUMAN (P35527)                                       | Keratin, type I cytoskeletal 9            | HUMAN                 |
|              |         |         | 4                             | 6.91              | 5.733558              | K1C10_HUMAN (P13645)                                      | Keratin, type I cytoskeletal 10           | HUMAN                 |
|              |         | 5       | 4                             | 10.28037          | CAS1_BOVIN (P02662)   | Alpha-S1-casein precursor                                 | BOVIN                                     |                       |
| C            | CPBF6HA | 1       | 13.05                         | 21.64502          | TRYP_PIG (P00761)     | Trypsin precursor (EC 3.4.21.4)                           | PIG                                       |                       |
|              |         | 2       | 8.37                          | 11.45194          | XM_650544             | $\alpha$ -Amylase, putative 25.t00021 AAFB01000107        | <i>E. histolytica</i>                     |                       |
|              |         | 3       | 5.52                          | 12.34568          | IGHG1_MOUSE (P01868)  | Ig gamma-1 chain C region secreted form                   | MOUSE                                     |                       |
|              |         | 4       | 4                             | 4.012841          | K1C9_HUMAN (P35527)   | Keratin, type I cytoskeletal 9                            | HUMAN                                     |                       |
|              |         | 5       | 3.82                          | 3.732504          | K2C1_HUMAN (P04264)   | Keratin, type II cytoskeletal 1                           | HUMAN                                     |                       |
|              |         | 6       | 2.03                          | 1.173021          | BGAL_ECOLI (P00722)   | $\beta$ -Galactosidase (EC 3.2.1.23) (Lactase)            | <i>E. coli</i>                            |                       |
|              |         | CPBF8HA | 1                             | 16.96             | 21.64502              | TRYP_PIG (P00761)                                         | Trypsin precursor                         | PIG                   |
|              |         |         | 2                             | 10.06             | 9.020218              | K2C1_HUMAN (P04264)                                       | Keratin, type II cytoskeletal 1           | HUMAN                 |
|              |         |         | 3                             | 4.01              | 4.012841              | K1C9_HUMAN (P35527)                                       | Keratin, type I cytoskeletal 9            | HUMAN                 |
|              |         |         | 4                             | 3.08              | 1.517707              | K1C10_HUMAN (P13645)                                      | Keratin, type I cytoskeletal 10           | HUMAN                 |
|              |         |         | 5                             | 5.52              | 3.72093               | K22E_HUMAN (P35908)                                       | Keratin, type II cytoskeletal 2 epidermal | HUMAN                 |
|              |         | HA      | 1                             | 13.1              | 10.57543              | K2C1_HUMAN (P04264)                                       | Keratin, type II cytoskeletal 1           | HUMAN                 |
|              |         |         | 2                             | 8.67              | 9.147287              | K22E_HUMAN (P35908)                                       | Keratin, type II cytoskeletal 2 epidermal | HUMAN                 |
|              |         | 3       | 7.69                          | 21.64502          | TRYP_PIG (P00761)     | Trypsin precursor (EC 3.4.21.4)                           | PIG                                       |                       |
|              |         | 4       | 4.76                          | 3.878583          | K1C10_HUMAN (P13645)  | Keratin, type I cytoskeletal 10                           | HUMAN                                     |                       |

1: Total prot score was calculated by protein pilot™ software.

2: Percentage coverage was calculated using only the peptides detected with a probability greater than 95 %.

Three excised bands (A-C) are shown in Figure 1A.
