# Supplementary material
Source: PubMed Central journal article supplement (PMC3648001)
Supplement: IAI.00915-12_zii999090131so2.pdf [file IAI.00915-12_zii999090131so2.pdf]

Table S2. The list of proteins detected from phagosomes in control and CPBF6gs strains.

| Identified proteins |                                                                               | Averaged coverage from phagosomes |                | standard deviation %coverage from phagosomes (percentage point) <sup>1</sup> |                | (Coverage of CPBF6gs strain) - (Coverage of control strain) (percentage point) | p-value <sup>2</sup> | Significance <sup>3</sup> | Detected in the previous study <sup>4</sup> |
|---------------------|-------------------------------------------------------------------------------|-----------------------------------|----------------|------------------------------------------------------------------------------|----------------|--------------------------------------------------------------------------------|----------------------|---------------------------|---------------------------------------------|
|                     |                                                                               | Control strain                    | CPBF6gs strain | Control strain                                                               | CPBF6gs strain |                                                                                |                      |                           |                                             |
| EAL41855            | CPBF6                                                                         | 33                                | 33             | 0                                                                            | 0              | -35                                                                            | 0.00142              | x                         | x                                           |
| EAL4320             | RabX31                                                                        | 71%                               | 42%            | 15                                                                           | 19             | -22                                                                            | 0.22206              | x                         | x                                           |
| EAL4348             | Rab9B                                                                         | 44%                               | 16%            | 21                                                                           | 10             | -28                                                                            | 0.4287851            | x                         | x                                           |
| EAL50253            | alpha-amylase family protein                                                  | 28%                               | 2%             | 5                                                                            | 2              | -27                                                                            | 0.0001017            | o                         | o                                           |
| XP_653922           | 40S ribosomal protein S15a                                                    | 37%                               | 11%            | 22                                                                           | 13             | -26                                                                            | 0.5862859            | x                         | x                                           |
| EAL49999            | hypothetical protein                                                          | 50%                               | 26%            | 23                                                                           | 20             | -24                                                                            | 0.758455             | x                         | x                                           |
| EAL51966            | sgp86                                                                         | 35%                               | 11%            | 14                                                                           | 9              | -24                                                                            | 0.188365             | x                         | x                                           |
| EAL47201            | hypothetical protein                                                          | 36%                               | 15%            | 20                                                                           | 14             | -21                                                                            | 0.1552867            | x                         | x                                           |
| BAB40674            | Rab7A                                                                         | 59%                               | 38%            | 20                                                                           | 23             | -21                                                                            | 0.8051289            | x                         | o                                           |
| EAL48855            | calreticulin                                                                  | 36%                               | 15%            | 9                                                                            | 9              | -20                                                                            | 0.096301             | x                         | x                                           |
| EDS89284            | hypothetical protein                                                          | 31%                               | 11%            | 10                                                                           | 13             | -20                                                                            | 0.121229             | x                         | x                                           |
| EAL45256            | cysteine proteinase 2                                                         | 46%                               | 28%            | 7                                                                            | 5              | -20                                                                            | 0.0121078            | o                         | o                                           |
| EAL44037            | hypothetical protein                                                          | 38%                               | 20%            | 13                                                                           | 10             | -18                                                                            | 0.4602297            | x                         | o                                           |
| EAL43471            | hypothetical protein                                                          | 37%                               | 19%            | 9                                                                            | 10             | -18                                                                            | 0.2663781            | x                         | x                                           |
| EDS89207            | granin                                                                        | 29%                               | 11%            | 11                                                                           | 13             | -18                                                                            | 0.3675491            | x                         | x                                           |
| BAB40673            | Rab5                                                                          | 39%                               | 21%            | 14                                                                           | 13             | -17                                                                            | 0.6293862            | x                         | o                                           |
| EAL52074            | Gal/GalNAc lectin light subunit                                               | 49%                               | 32%            | 15                                                                           | 10             | -17                                                                            | 0.8151219            | x                         | o                                           |
| EAL45367            | hypothetical protein                                                          | 28%                               | 11%            | 11                                                                           | 8              | -17                                                                            | 0.2350205            | x                         | o                                           |
| EAL48172            | hypothetical protein                                                          | 33%                               | 16%            | 19                                                                           | 18             | -17                                                                            | 0.9691599            | x                         | x                                           |
| EAL49320            | ADP-ribosylation factor                                                       | 27%                               | 10%            | 14                                                                           | 9              | -17                                                                            | 0.3520286            | x                         | x                                           |
| EAL50412            | hypothetical protein                                                          | 12%                               | 12%            | 10                                                                           | 3              | -16                                                                            | 0.0701953            | x                         | o                                           |
| EAL48966            | RabC3                                                                         | 39%                               | 23%            | 12                                                                           | 9              | -16                                                                            | 0.4387284            | x                         | x                                           |
| EAL48129            | Vacuolar ATP synthase subunit d                                               | 31%                               | 15%            | 15                                                                           | 9              | -16                                                                            | 0.8997717            | x                         | o                                           |
| CAA62835            | cysteine proteinase                                                           | 49%                               | 34%            | 11                                                                           | 10             | -15                                                                            | 0.3936681            | x                         | o                                           |
| XP_001738779        | Ras family GTPase                                                             | 42%                               | 27%            | 8                                                                            | 2              | -15                                                                            | 0.0623889            | x                         | o                                           |
| BAD34971            | EnRab7p                                                                       | 39%                               | 13%            | 8                                                                            | 6              | -15                                                                            | 0.0587336            | x                         | o                                           |
| EAL50759            | calactose-inhibitable lectin 95 kDa subunit precursor                         | 49%                               | 25%            | 18                                                                           | 9              | -15                                                                            | 0.9586117            | x                         | o                                           |
| EAL44451            | N-acetylneuraminidase                                                         | 35%                               | 30%            | 14                                                                           | 12             | -14                                                                            | 0.7150852            | x                         | x                                           |
| EAL45317            | Ras family GTPase                                                             | 28%                               | 14%            | 15                                                                           | 6              | -14                                                                            | 0.7067372            | x                         | x                                           |
| EAL43030            | dipeptidyl peptidase                                                          | 33%                               | 19%            | 13                                                                           | 8              | -14                                                                            | 0.4733478            | x                         | x                                           |
| XP_656206           | RabX30                                                                        | 23%                               | 9%             | 14                                                                           | 8              | -14                                                                            | 0.7710198            | x                         | x                                           |
| EDS89335            | hypothetical protein                                                          | 13%                               | 13%            | 7                                                                            | 6              | -13                                                                            | 0.3945992            | x                         | o                                           |
| BAB40669            | Rab1A                                                                         | 37%                               | 24%            | 11                                                                           | 12             | -13                                                                            | 0.8841427            | x                         | o                                           |
| EH_059670           | RabD1                                                                         | 21%                               | 8%             | 12                                                                           | 9              | -13                                                                            | 0.5263419            | x                         | x                                           |
| EAL48551            | Receptor mediated endocytosis protein                                         | 32%                               | 19%            | 9                                                                            | 5              | -13                                                                            | 0.3441457            | x                         | o                                           |
| EAL47808            | lysozyme                                                                      | 50%                               | 37%            | 16                                                                           | 8              | -13                                                                            | 0.8376193            | x                         | o                                           |
| AAF43042            | malic enzyme                                                                  | 15%                               | 2%             | 11                                                                           | 2              | -12                                                                            | 0.3558418            | x                         | x                                           |
| EDS89288            | hypothetical protein                                                          | 15%                               | 9%             | 9                                                                            | 3              | -12                                                                            | 0.3581265            | x                         | o                                           |
| EAL48914            | alcohol dehydrogenase                                                         | 18%                               | 5%             | 9                                                                            | 5              | -12                                                                            | 0.3344019            | x                         | x                                           |
| EAL48719            | vacuolar sorting protein VPS4                                                 | 21%                               | 9%             | 14                                                                           | 14             | -12                                                                            | 0.9230076            | x                         | x                                           |
| EAL48166            | hypothetical protein                                                          | 36%                               | 23%            | 6                                                                            | 4              | -12                                                                            | 0.0929954            | x                         | o                                           |
| EAL45006            | protein phosphatase family protein                                            | 22%                               | 9%             | 11                                                                           | 8              | -12                                                                            | 0.8122316            | x                         | x                                           |
| XP_648717           | elongation factor 1-alpha 1                                                   | 30%                               | 18%            | 9                                                                            | 4              | -12                                                                            | 0.1544165            | x                         | x                                           |
| EAL45816            | thrombospondin                                                                | 30%                               | 16%            | 14                                                                           | 12             | -12                                                                            | 0.9748036            | x                         | x                                           |
| EAL48580            | hypothetical protein                                                          | 20%                               | 8%             | 5                                                                            | 2              | -12                                                                            | 0.0379193            | o                         | x                                           |
| EAL51170            | hypothetical protein                                                          | 24%                               | 12%            | 7                                                                            | 5              | -12                                                                            | 0.0686164            | x                         | x                                           |
| BAB40670            | RabC1                                                                         | 24%                               | 12%            | 9                                                                            | 9              | -12                                                                            | 0.4348907            | x                         | o                                           |
| EAL4582             | beta-keto acyl reductase                                                      | 14%                               | 2%             | 7                                                                            | 4              | -11                                                                            | 0.2123294            | x                         | x                                           |
| EAL51539            | hypothetical protein                                                          | 11%                               | 0%             | 8                                                                            | 0              | -11                                                                            | 0.1880645            | x                         | x                                           |
| EAL48788            | alcohol dehydrogenase                                                         | 19%                               | 5%             | 7                                                                            | 5              | -11                                                                            | 0.2235791            | x                         | x                                           |
| PS1555              | pectate                                                                       | 34%                               | 23%            | 11                                                                           | 3              | -11                                                                            | 0.74315              | x                         | x                                           |
| EAL44887            | beta-N-acetylhexosaminidase                                                   | 37%                               | 26%            | 10                                                                           | 7              | -11                                                                            | 0.6187389            | x                         | o                                           |
| EAL42646            | URE3-BP sequence specific DNA binding protein                                 | 17%                               | 5%             | 9                                                                            | 6              | -11                                                                            | 0.5264412            | x                         | x                                           |
| EAL52013            | ganglioside gm2 activator protein                                             | 23%                               | 12%            | 6                                                                            | 5              | -11                                                                            | 0.1912871            | x                         | x                                           |
| EAL47855            | ARP2/3 complex 21 kDa subunit                                                 | 22%                               | 11%            | 10                                                                           | 7              | -11                                                                            | 0.351598             | x                         | x                                           |
| EAL48995            | alpha-amylase                                                                 | 15%                               | 12%            | 9                                                                            | 2              | -11                                                                            | 0.0031794            | o                         | x                                           |
| AALF2264            | dipeptidyl peptidase                                                          | 15%                               | 8%             | 6                                                                            | 5              | -11                                                                            | 0.1902823            | x                         | x                                           |
| EAL50936            | EnRabX11                                                                      | 28%                               | 16%            | 14                                                                           | 7              | -10                                                                            | 0.9130904            | x                         | x                                           |
| XP_001739563        | triosphosphate isomerase                                                      | 17%                               | 7%             | 12                                                                           | 4              | -10                                                                            | 0.549929             | x                         | x                                           |
| EAL48866            | EnRabM2                                                                       | 13%                               | 3%             | 4                                                                            | 3              | -10                                                                            | 0.0597297            | x                         | o                                           |
| EAL49001            | hypothetical protein                                                          | 15%                               | 4%             | 3                                                                            | 6              | -10                                                                            | 0.0425177            | o                         | x                                           |
| EAL47513            | CPBF6                                                                         | 33%                               | 23%            | 5                                                                            | 4              | -10                                                                            | 0.0891385            | x                         | x                                           |
| EAL45671            | hypothetical protein                                                          | 18%                               | 6%             | 8                                                                            | 2              | -10                                                                            | 0.2873805            | x                         | x                                           |
| EAL44332            | acid phosphatase                                                              | 25%                               | 14%            | 7                                                                            | 9              | -10                                                                            | 0.4498522            | x                         | o                                           |
| AAA29114            | RacName_Full/Rac-like GTP-binding protein RHO1                                | 21%                               | 11%            | 8                                                                            | 7              | -10                                                                            | 0.4892885            | x                         | x                                           |
| EAL51529            | hypothetical protein                                                          | 22%                               | 11%            | 8                                                                            | 3              | -10                                                                            | 0.2471148            | x                         | o                                           |
| EAL47892            | actin                                                                         | 15%                               | 5%             | 9                                                                            | 6              | -10                                                                            | 0.3839564            | x                         | x                                           |
| AP_208300           | actinin-like protein                                                          | 15%                               | 3%             | 7                                                                            | 2              | -10                                                                            | 0.1588995            | x                         | x                                           |
| AAA28996            | RacName_Full/Cytosine proteinase 1; Flag; Precursor                           | 30%                               | 20%            | 5                                                                            | 4              | -10                                                                            | 0.1113264            | x                         | o                                           |
| EAL50768            | Ras GTPase activating protein                                                 | 13%                               | 3%             | 5                                                                            | 3              | -10                                                                            | 0.1028811            | x                         | x                                           |
| EAL49122            | immuno-dominant variable surface antigen                                      | 22%                               | 12%            | 7                                                                            | 2              | -10                                                                            | 0.5102768            | x                         | o                                           |
| XP_001913357        | type A flavoprotein                                                           | 11%                               | 2%             | 8                                                                            | 2              | -10                                                                            | 0.3448895            | x                         | x                                           |
| EAL45068            | heat shock protein 70                                                         | 13%                               | 3%             | 7                                                                            | 4              | -10                                                                            | 0.4310124            | x                         | x                                           |
| XP_651737           | guanine nucleotide-binding protein alpha-16 subunit [Entamoeba dispar SAW780] | 32%                               | 22%            | 8                                                                            | 12             | -10                                                                            | 0.5685201            | x                         | x                                           |
| EDS89884            | hypothetical protein                                                          | 29%                               | 19%            | 26                                                                           | 2              | -10                                                                            | 0.1721973            | x                         | o                                           |
| EAL49871            | lecithin:cholesterol acyltransferase domain-containing protein                | 17%                               | 10%            | 10                                                                           | 7              | -10                                                                            | 0.849327             | x                         | o                                           |
| EDS89370            | adenylylase-associated protein                                                | 11%                               | 2%             | 7                                                                            | 4              | -9                                                                             | 0.1128876            | x                         | o                                           |
| EAL51216            | cysteine proteinase                                                           | 19%                               | 10%            | 6                                                                            | 8              | -9                                                                             | 0.3904464            | x                         | o                                           |
| EAL46868            | hypothetical protein                                                          | 11%                               | 2%             | 7                                                                            | 3              | -9                                                                             | 0.388442             | x                         | x                                           |
| EAL46302            | actophorin                                                                    | 18%                               | 9%             | 10                                                                           | 8              | -9                                                                             | 0.5341147            | x                         | x                                           |
| AAF14855            | dyrannin 2                                                                    | 39%                               | 26%            | 7                                                                            | 6              | -9                                                                             | 0.3407242            | x                         | x                                           |
| EAL45484            | hypothetical protein                                                          | 35%                               | 27%            | 6                                                                            | 3              | -9                                                                             | 0.108724             | x                         | o                                           |
| EAL47035            | cortactin II                                                                  | 13%                               | 4%             | 7                                                                            | 5              | -9                                                                             | 0.452502             | x                         | x                                           |
| EAL42895            | peptidyl prolyl cis-trans isomerase                                           | 14%                               | 5%             | 4                                                                            | 4              | -9                                                                             | 0.1018191            | x                         | x                                           |
| EDS89285            | hypothetical protein                                                          | 10%                               | 2%             | 4                                                                            | 3              | -9                                                                             | 0.0518414            | x                         | x                                           |
| EAL45540            | actin-binding protein                                                         | 17%                               | 8%             | 12                                                                           | 7              | -9                                                                             | 0.4893811            | x                         | x                                           |
| XP_648628           | actin                                                                         | 15%                               | 4%             | 8                                                                            | 6              | -9                                                                             | 0.411812             | x                         | x                                           |
| EAL51636            | peroxylate:ferredoxin oxidoreductase                                          | 11%                               | 2%             | 5                                                                            | 2              | -9                                                                             | 0.1558585            | x                         | x                                           |
| EAL48243            | lysine and glutamic acid-rich protein 1 (KERP1)                               | 10%                               | 2%             | 6                                                                            | 4              | -8                                                                             | 0.1887512            | x                         | x                                           |
| EAL47961            | guanine nucleotide-binding protein subunit beta                               | 18%                               | 9%             | 10                                                                           | 8              | -8                                                                             | 0.9317493            | x                         | x                                           |
| EAL50295            | EH-domain containing protein                                                  | 22%                               | 14%            | 9                                                                            | 5              | -8                                                                             | 0.9205897            | x                         | x                                           |
| EDS89126            | hypothetical protein                                                          | 13%                               | 5%             | 4                                                                            | 3              | -8                                                                             | 0.1051217            | x                         | x                                           |
| EAL49351            | 70 kDa heat shock protein                                                     | 13%                               | 5%             | 9                                                                            | 4              | -8                                                                             | 0.3982859            | x                         | x                                           |
| EAL48178            | vacuolar protein ATPase subunit                                               | 19%                               | 11%            | 7                                                                            | 3              | -8                                                                             | 0.8649652            | x                         | x                                           |
| EAL50171            | hypothetical protein                                                          | 9%                                | 1%             | 2                                                                            | 2              | -8                                                                             | 0.2687719            | x                         | x                                           |
| EAL42894            | synactin binding protein                                                      | 11%                               | 2%             | 4                                                                            | 4              | -8                                                                             | 0.1807404            | x                         | x                                           |
| EAL51221            | hypothetical protein                                                          | 56%                               | 48%            | 8                                                                            | 7              | -8                                                                             | 0.523942             | x                         | o                                           |
| EAL51030            | hypothetical protein                                                          | 22%                               | 14%            | 7                                                                            | 2              | -8                                                                             | 0.7321633            | x                         | o                                           |
| EAL48544            | hypothetical protein                                                          | 9%                                | 1%             | 6                                                                            | 9              | -8                                                                             | 0.2520789            | x                         | x                                           |
| EAL40351            | hypothetical protein                                                          | 8%                                | 0%             | 4                                                                            | 4              | -8                                                                             | 0.0371463            | x                         | x                                           |
| EAL51294            | small GTPase ArfB1                                                            | 9%                                | 1%             | 6                                                                            | 3              | -8                                                                             | 0.3722437            | x                         | x                                           |
| AAA21446            | Ras family GTPase                                                             | 19%                               | 11%            | 6                                                                            | 10             | -8                                                                             | 0.4196214            | x                         | x                                           |
| EAL47848            | hypothetical protein                                                          | 18%                               | 10%            | 5                                                                            | 9              | -8                                                                             | 0.5020275            | x                         | x                                           |
| XP_654359           | glyoxaldehyde-3-phosphate dehydrogenase                                       | 26%                               | 18%            | 11                                                                           | 7              | -8                                                                             | 0.8939638            | x                         | x                                           |
| EDS89796            | hypothetical protein                                                          | 11%                               | 3%             | 4                                                                            | 4              | -7                                                                             | 0.1526539            | x                         | x                                           |
| EAL45323            | actinin                                                                       | 17%                               | 10%            | 6                                                                            | 4              | -7                                                                             | 0.3655051            | x                         | o                                           |
| EAL43716            | enhancer binding protein-2                                                    | 9%                                | 2%             | 5                                                                            | 3              | -7                                                                             | 0.4047164            | x                         | x                                           |
| EAL48809            | hypothetical protein                                                          | 53%                               | 46%            | 14                                                                           | 18             | -7                                                                             | 0.8848529            | x                         | o                                           |
| EAL46860            | hypothetical protein                                                          | 7%                                | 0%             | 4                                                                            | 0              | -7                                                                             | 0.1339746            | x                         | x                                           |
| EAL49773            | RhoGAP domain containing protein                                              | 11%                               | 4%             | 5                                                                            | 4              | -7                                                                             | 0.3208719            | x                         | x                                           |
| EAL50624            | SNF7 family protein                                                           | 12%                               | 6%             | 7                                                                            | 5              | -7                                                                             | 0.607072             | x                         | x                                           |
| EAL50026            | cell surface protease ggd3                                                    | 12%                               | 13%            | 6                                                                            | 2              | -7                                                                             | 0.4944105            | x                         | o                                           |
| BAD34978            | Rab1A                                                                         | 15%                               | 11%            | 6                                                                            | 4              | -7                                                                             | 0.5050709            | x                         | x                                           |
| EAL44987            | fructose-1,6-bisphosphate aldolase                                            | 14%                               | 7%             | 8                                                                            | 4              | -7                                                                             | 0.6467654            | x                         | x                                           |
| EAL52137            | Ran family GTPase                                                             | 7%                                | 0%             | 7                                                                            | 0              | -7                                                                             | 0.3559177            | x                         | x                                           |
| EAL49200            | hypothetical protein                                                          | 7%                                | 0%             | 7                                                                            | 0              | -7                                                                             | 0.3559177            | x                         | x                                           |
| EAL47854            | granin                                                                        | 9%                                | 2%             | 6                                                                            | 3              | -7                                                                             | 0.5586875            | x                         | x                                           |
| EAL48913            | hypothetical protein                                                          | 10%                               | 3%             | 5                                                                            | 4              | -7                                                                             | 0.3820978            | x                         | x                                           |
| EAL51212            | Pr-alycoactosin B                                                             | 8%                                | 2%             | 4                                                                            | 1              | -7                                                                             | 0.1821446            | x                         | x                                           |
| EAL44481            | hypothetical protein                                                          | 8%                                | 2%             | 4                                                                            | 3              | -6                                                                             | 0.2157169            | x                         | x                                           |
| EAL47477            | F-actin capping protein beta subunit                                          | 9%                                | 3%             | 5                                                                            | 3              | -6                                                                             | 0.2995989            | x                         | x                                           |
| EAL45315            | hypothetical protein                                                          | 18%                               | 12%            | 7                                                                            | 6              | -6                                                                             | 0.3858792            | x                         | x                                           |
| AAA18944            | pyruvate phosphate dikinase                                                   | 11%                               | 5%             | 5                                                                            | 4              | -6                                                                             | 0.3913954            | x                         | x                                           |
| EAL48703            | serine carboxypeptidase (S28) family protein                                  | 16%                               | 16%            | 5                                                                            | 4              | -6                                                                             | 0.3739866            | x                         | o                                           |
| EAL44223            | Rab1C                                                                         | 23%                               | 24%            | 8                                                                            | 30%            | -6                                                                             | 0.8958958            | x                         | o                                           |
| EAL47899            | high-affinity potassium uptake transporter                                    | 6%                                | 1%             | 3                                                                            | 1              | -5                                                                             | 0.0677708            | x                         | x                                           |
|                     |                                                                               |                                   |                |                                                                              |                |                                                                                |                      |                           |                                             |

|              |                                                                        |     |     |    |    |    |            |   |   |
|--------------|------------------------------------------------------------------------|-----|-----|----|----|----|------------|---|---|
| EAL43400     | C2 domain containing protein                                           | 8%  | 3%  | 8  | 4  | -5 | 0.8278065  | x | x |
| EAL43348     | enhancer binding protein 2 (EBP2)                                      | 9%  | 5%  | 6  | 6  | -5 | 1          | x | x |
| EAL50906     | hypothetical protein                                                   | 6%  | 1%  | 4  | 1  | -5 | 0.3827383  | x | x |
| EAL43285     | phosphoglucomutase/phosphomannomutase family protein                   | 0%  | 0%  | 4  | 2  | -5 | 0.4568276  | x | x |
| EAL43378     | nucleic dehydrogenase                                                  | 3%  | 1%  | 3  | 1  | -3 | 0.2880739  | x | x |
| AKK92361     | hypothetical protein                                                   | 38% | 34% | 4  | 5  | -4 | 0.6014174  | x | ○ |
| XP_001912541 | nicotinamide nucleotide transhydrogenase                               | 34% | 29% | 4  | 4  | -4 | 0.6654176  | x | x |
| EDS89309     | hypothetical protein                                                   | 20% | 16% | 11 | 8  | -4 | 0.9003405  | x | x |
| EAL43804     | lecithin:cholesterol acyltransferase domain-containing protein         | 9%  | 4%  | 4  | 4  | -4 | 0.6208942  | x | x |
| EAL45537     | WD domain containing protein                                           | 5%  | 1%  | 2  | 1  | -4 | 0.50179153 | ○ | x |
| EAL50665     | hypothetical protein                                                   | 7%  | 3%  | 3  | 3  | -4 | 0.437064   | x | x |
| EAL48132     | hypothetical protein                                                   | 4%  | 0%  | 3  | 0  | -4 | 0.1651984  | x | x |
| EAL49821     | Rab22                                                                  | 11% | 7%  | 6  | 10 | -4 | 0.8388525  | x | x |
| EAL46589     | hypothetical protein                                                   | 13% | 8%  | 3  | 2  | -4 | 0.2878632  | x | x |
| EAL43613     | hypothetical protein                                                   | 5%  | 1%  | 3  | 1  | -4 | 0.3242437  | x | x |
| EAL47110     | hypothetical protein                                                   | 9%  | 5%  | 3  | 5  | -4 | 0.4858355  | x | x |
| EAL48139     | Plasma membrane calcium-transporting ATPase                            | 11% | 7%  | 3  | 4  | -4 | 0.6059578  | x | ○ |
| EHL164800    | CPBF1                                                                  | 29% | 22% | 4  | 2  | -4 | 0.576327   | x | ○ |
| EAL51399     | hypothetical protein                                                   | 6%  | 2%  | 3  | 2  | -4 | 0.2715069  | x | x |
| EAL46316     | multidrug resistance protein                                           | 9%  | 5%  | 3  | 4  | -4 | 0.718506   | x | ○ |
| EAL45296     | vacuolar ATP synthase subunit C                                        | 5%  | 1%  | 5  | 1  | -4 | 0.5355706  | x | x |
| EAL48457     | hypothetical protein                                                   | 11% | 7%  | 0  | 9  | -4 | 0.4290407  | x | x |
| EAL45923     | elongation factor 2                                                    | 4%  | 1%  | 2  | 1  | -4 | 0.2664176  | x | x |
| EAL51407     | Vesicle-fusing ATPase                                                  | 8%  | 5%  | 4  | 4  | -4 | 0.8752567  | x | x |
| EAL47525     | competence protein ComEC                                               | 5%  | 2%  | 3  | 2  | -4 | 0.6875632  | x | x |
| XP_001913620 | hypothetical protein [Entamoeba dispar SAW760]                         | 4%  | 0%  | 3  | 1  | -4 | 0.1343558  | x | x |
| EAL49497     | protein kinase                                                         | 4%  | 1%  | 7  | 4  | -4 | 0.3902585  | x | x |
| BAE94769     | hypothetical protein                                                   | 7%  | 4%  | 9  | 10 | -4 | 0.420407   | x | x |
| BAO34999     | Rab70                                                                  | 10% | 14% | 4  | 0  | -4 | 0.7116294  | x | ○ |
| EAL51523     | endo-1,4-beta-xylanase                                                 | 4%  | 1%  | 4  | 2  | -4 | 0.8110968  | x | x |
| EAL48354     | RabM3                                                                  | 13% | 9%  | 6  | 0  | -3 | 0.5201788  | x | x |
| EAL51401     | EhRab2C                                                                | 8%  | 4%  | 4  | 3  | -3 | 0.6991563  | x | x |
| EAL51906     | MIT domain protein                                                     | 10% | 6%  | 2  | 3  | -3 | 0.2102842  | x | x |
| AAU43735     | SecE1 alpha subunit                                                    | 3%  | 0%  | 2  | 0  | -3 | 0.0536363  | x | x |
| EAL5178      | hypothetical protein                                                   | 7%  | 10% | 5  | 5  | -3 | 0.1        | x | x |
| EAL41460     | hypothetical protein                                                   | 21% | 18% | 2  | 2  | -3 | 0.1825325  | x | x |
| EAL52042     | hypothetical protein                                                   | 7%  | 4%  | 3  | 4  | -3 | 0.8364233  | x | x |
| EAL50904     | acetyl-CoA synthetase                                                  | 5%  | 2%  | 3  | 2  | -3 | 0.4124198  | x | x |
| EAL45346     | hypothetical protein                                                   | 4%  | 1%  | 2  | 1  | -3 | 0.36455    | x | x |
| QAA57862     | hexokinase                                                             | 3%  | 0%  | 3  | 0  | -3 | 0.3559177  | x | x |
| EAL48247     | glucosylase II alpha subunit                                           | 3%  | 0%  | 2  | 0  | -3 | 0.1030374  | x | x |
| EAL43167     | hypothetical protein                                                   | 7%  | 3%  | 3  | 3  | -3 | 0.5732616  | x | x |
| EAL51014     | hypothetical protein                                                   | 3%  | 0%  | 2  | 1  | -3 | 0.3221905  | x | x |
| EAL50124     | hypothetical protein                                                   | 21% | 18% | 7  | 8  | -3 | 0.597782   | x | ○ |
| P19476       | peroxiredoxin                                                          | 10% | 7%  | 6  | 5  | -3 | 0.8021161  | x | x |
| AAO03565     | cysteine proteinase                                                    | 11% | 9%  | 8  | 7  | -3 | 0.1812244  | x | x |
| EAL48623     | hypothetical protein                                                   | 7%  | 4%  | 4  | 3  | -3 | 0.1        | x | x |
| EAL50314     | alpha-amylase family protein                                           | 4%  | 2%  | 3  | 2  | -3 | 0.8243163  | x | x |
| XP_654747    | ARP2/3 complex 34 kDa subunit                                          | 10% | 8%  | 4  | 6  | -3 | 0.838506   | x | x |
| EAL48861     | hypothetical protein                                                   | 4%  | 1%  | 2  | 1  | -3 | 0.5125481  | x | x |
| EAL52155     | hypothetical protein                                                   | 5%  | 2%  | 2  | 5  | -3 | 0.2080637  | x | x |
| EAL51316     | hypothetical protein                                                   | 14% | 11% | 5  | 7  | -3 | 0.8152192  | x | x |
| EAL48413     | Rho family GTPase                                                      | 27% | 25% | 4  | 8  | -3 | 0.8161755  | x | ○ |
| EAL44421     | hypothetical protein                                                   | 3%  | 2%  | 2  | 3  | -3 | 0.6572938  | x | x |
| AAP73788     | longin-type vesicle-associated membrane protein                        | 8%  | 6%  | 2  | 4  | -3 | 0.4986401  | x | x |
| EAL48907     | hypothetical protein                                                   | 2%  | 0%  | 7  | 0  | -2 | 0.2022024  | x | x |
| EAL4888      | nucleoside transporter                                                 | 11% | 9%  | 3  | 4  | -2 | 0.8817855  | x | ○ |
| EAL48832     | short chain dehydrogenase family protein                               | 4%  | 2%  | 2  | 4  | -2 | 0.5769605  | x | x |
| EAL47897     | calpain homology domain protein                                        | 0%  | 0%  | 2  | 0  | -2 | 0.1740074  | x | x |
| EAL46028     | hypothetical protein                                                   | 4%  | 1%  | 4  | 4  | -2 | 0.8317281  | x | x |
| EAL46577     | hypothetical protein                                                   | 22% | 19% | 4  | 7  | -2 | 0.8526541  | x | ○ |
| EAL43464     | hypothetical protein                                                   | 29% | 26% | 5  | 11 | -2 | 0.9345754  | x | x |
| EAL49096     | hypothetical protein                                                   | 8%  | 5%  | 2  | 1  | -2 | 0.5763186  | x | ○ |
| EAL45033     | alcohol dehydrogenase                                                  | 5%  | 3%  | 3  | 4  | -2 | 0.8030049  | x | x |
| EDS89778     | hypothetical protein                                                   | 6%  | 3%  | 2  | 3  | -2 | 0.2893919  | x | x |
| EAL51958     | hypothetical protein                                                   | 4%  | 1%  | 2  | 3  | -2 | 0.4993066  | x | x |
| EAL47106     | protein kinase                                                         | 2%  | 0%  | 2  | 0  | -2 | 0.3558177  | x | x |
| EAL44584     | 80 kDa heat shock protein                                              | 5%  | 3%  | 3  | 2  | -2 | 0.7646229  | x | x |
| EAL43748     | hypothetical protein                                                   | 3%  | 1%  | 2  | 1  | -2 | 0.5582922  | x | x |
| EDS89560     | hypothetical protein                                                   | 3%  | 1%  | 1  | 1  | -2 | 0.1404828  | x | x |
| EAL49998     | thioredoxin                                                            | 4%  | 2%  | 5  | 4  | -2 | 0.5393633  | x | x |
| EAL48997     | hypothetical protein                                                   | 1%  | 2%  | 2  | 1  | -2 | 0.5116266  | x | x |
| XP_650865    | ARPP23 complex 30 kDa subunit                                          | 10% | 9%  | 8  | 9  | -2 | 0.8547122  | x | x |
| EAL45284     | protein disulfide isomerase                                            | 13% | 11% | 1  | 4  | -2 | 0.3117823  | x | x |
| EAL46705     | hypothetical protein                                                   | 9%  | 7%  | 3  | 3  | -2 | 0.7789914  | x | x |
| AACA1577     | NAD(P) transhydrogenase subunit alpha                                  | 7%  | 5%  | 1  | 2  | -2 | 0.3498486  | x | x |
| EAL45200     | hypothetical protein                                                   | 13% | 11% | 6  | 5  | -2 | 0.8420136  | x | x |
| EAL48896     | hypothetical protein                                                   | 23% | 21% | 3  | 4  | -2 | 0.7694228  | x | ○ |
| EAL48698     | hypothetical protein                                                   | 3%  | 2%  | 2  | 1  | -2 | 0.8550456  | x | x |
| EAL51029     | EF-hand calcium-binding domain containing protein                      | 2%  | 0%  | 2  | 0  | -2 | 0.3559177  | x | x |
| EAL48332     | hypothetical protein                                                   | 4%  | 2%  | 3  | 2  | -2 | 0.6680099  | x | x |
| EAL49058     | Rho guanine nucleotide exchange factor                                 | 3%  | 1%  | 2  | 1  | -2 | 0.7480238  | x | x |
| EAL50856     | WD repeat                                                              | 4%  | 2%  | 4  | 2  | -2 | 0.8561016  | x | x |
| EAL43129     | hypothetical protein                                                   | 2%  | 1%  | 2  | 1  | -2 | 0.3818972  | x | x |
| EAL48728     | protein kinase domain containing protein                               | 2%  | 0%  | 2  | 2  | -2 | 0.2133936  | x | x |
| EAL43605     | receptor protein kinase                                                | 2%  | 1%  | 1  | 2  | -2 | 0.5387758  | x | x |
| EAL50138     | hypothetical protein                                                   | 6%  | 5%  | 2  | 2  | -2 | 0.1        | x | ○ |
| EAL45091     | hypothetical protein                                                   | 3%  | 1%  | 2  | 1  | -2 | 0.2619664  | x | x |
| EAL43848     | hypothetical protein                                                   | 2%  | 0%  | 3  | 0  | -2 | 0.051238   | x | x |
| AAP04256     | adhesin 112 (EPAH112)                                                  | 7%  | 6%  | 5  | 4  | -1 | 0.930023   | x | x |
| EAL50467     | protein tyrosine phosphatase                                           | 4%  | 2%  | 2  | 3  | -1 | 0.7623386  | x | x |
| EAL47310     | Rho family GTPase                                                      | 15% | 13% | 2  | 3  | -1 | 0.32032    | x | ○ |
| EAL51888     | filamin 2                                                              | 3%  | 1%  | 1  | 1  | -1 | 0.6460143  | x | x |
| EAL51082     | WD domain containing protein                                           | 3%  | 1%  | 3  | 1  | -1 | 0.1        | x | x |
| EAL50740     | hypothetical protein                                                   | 11% | 10% | 2  | 2  | -1 | 0.8510184  | x | x |
| EAL48899     | lecithin:cholesterol acyltransferase                                   | 9%  | 8%  | 5  | 7  | -1 | 0.8225372  | x | x |
| EAL48426     | Rho family GTPase                                                      | 3%  | 2%  | 5  | 3  | -1 | 0.1874716  | x | x |
| EAL48747     | HEAT repeat domain containing protein                                  | 1%  | 0%  | 1  | 0  | -1 | 0.3558177  | x | x |
| EAL48973     | hypothetical protein                                                   | 3%  | 2%  | 3  | 2  | -1 | 0.8848146  | x | x |
| EAL49915     | hypothetical protein                                                   | 3%  | 2%  | 0  | 3  | -1 | 0.8222747  | x | x |
| EAL50093     | hypothetical protein                                                   | 7%  | 6%  | 1  | 4  | -1 | 0.9907392  | x | x |
| EAL49577     | hypothetical protein                                                   | 2%  | 1%  | 1  | 1  | -1 | 0.5881407  | x | x |
| EAL45274     | hypothetical protein                                                   | 2%  | 1%  | 2  | 1  | -1 | 0.9160952  | x | x |
| EAL51626     | hypothetical protein                                                   | 2%  | 1%  | 3  | 1  | -1 | 0.2443872  | x | x |
| EAL50029     | galactose-specific adhesin 170ND subunit                               | 3%  | 2%  | 1  | 1  | -1 | 0.8788986  | x | x |
| EAL50633     | SH3 domain protein                                                     | 5%  | 4%  | 3  | 2  | -1 | 0.8957651  | x | x |
| EAL44614     | thioredoxin                                                            | 2%  | 1%  | 4  | 2  | -1 | 0.41044    | x | x |
| EAL43134     | synaptin                                                               | 4%  | 3%  | 5  | 2  | -1 | 0.1801959  | x | x |
| EAL45601     | putative plasma membrane calcium ion-transporting ATPase               | 2%  | 1%  | 1  | 1  | -1 | 0.3001676  | x | x |
| EAL48102     | hypothetical protein                                                   | 2%  | 2%  | 2  | 3  | -1 | 0.7180105  | x | x |
| EAL50641     | hypothetical protein                                                   | 8%  | 8%  | 2  | 3  | -1 | 0.783977   | x | ○ |
| EAL50824     | beta-N-acetylhexosaminidase                                            | 5%  | 5%  | 3  | 5  | -1 | 0.5959384  | x | x |
| BAB40678     | Rab11B                                                                 | 31% | 30% | 4  | 4  | -1 | 0.6364064  | x | ○ |
| EAL45971     | endoribonuclease L-PSP                                                 | 9%  | 9%  | 7  | 7  | 0  | 0.1        | x | x |
| EAL51098     | tyrosine kinase                                                        | 1%  | 1%  | 1  | 0  | 0  | 0.7994908  | x | x |
| EAL42112     | Rab family GTPase                                                      | 3%  | 2%  | 3  | 3  | 0  | 0.7402265  | x | x |
| EAL50843     | serine-threonine-isoleucine rich protein                               | 7%  | 6%  | 2  | 2  | 0  | 0.6879153  | x | x |
| AF338235     | diaphanous protein                                                     | 2%  | 1%  | 0  | 0  | 0  | 0.5995778  | x | x |
| BAB40676     | Rab11D                                                                 | 14% | 14% | 6  | 13 | 0  | 0.8861246  | x | x |
| EAL50553     | hypothetical protein                                                   | 2%  | 2%  | 2  | 2  | 0  | 0.8236374  | x | x |
| EAL51845     | myosin heavy chain                                                     | 0%  | 0%  | 1  | 0  | 0  | 0.3517628  | x | x |
| XP_001735596 | 14-3-3 protein 3                                                       | 3%  | 3%  | 3  | 3  | 0  | 0.8603095  | x | x |
| JEAL50648    | diaphanous protein                                                     | 1%  | 1%  | 1  | 1  | 0  | 0.5236647  | x | x |
| EAL48972     | leucine rich repeat / protein phosphatase 2C domain containing protein | 2%  | 2%  | 2  | 1  | 0  | 0.3506307  | x | x |
| EAL51834     | thioredoxin                                                            | 1%  | 1%  | 1  | 2  | 0  | 0.8722103  | x | x |
| EAL44647     | protein kinase domain containing protein                               | 0%  | 0%  | 1  | 0  | 0  | 0.658228   | x | x |
| EAL92563     | tyrosine kinase                                                        | 0%  | 0%  | 1  | 0  | 0  | 0.1522893  | x | x |
| EAL47395     | hypothetical protein                                                   | 0%  | 0%  | 0  | 4  | 0  | 0.1588543  | x | x |
| EAL47383     | hypothetical protein                                                   | 0%  | 0%  | 3  | 0  | 0  | 0.3559177  | x | x |
| EAL45499     | hypothetical protein                                                   | 16% | 16% | 0  | 0  | 0  | 0.1        | x | x |
| XP_650527    | ubiquitin                                                              | 32% | 32% | 0  | 0  | 0  | 0.1        | x | x |
| EAL50587     | hypothetical protein                                                   | 0%  | 0%  | 0  | 0  | 0  | 0.8573017  | x | x |
| EAL47239     | V-type ATPase                                                          | 11% | 11% | 4  | 3  | 0  | 0.8852377  | x | x |
| EAL48414     | hypothetical protein                                                   | 11% | 11% | 1  | 3  | 0  | 0.5952081  | x | x |
| EAL50872     | Rho family GTPase                                                      | 3%  | 3%  | 3  | 6  | 0  | 0.8820553  | x | x |
| EAL48917     | flotillin                                                              | 1%  | 1%  | 1  | 2  | 0  | 0.6387391  | x | ○ |
| EAL48310     | SNF7 family protein                                                    | 6%  | 6%  | 3  | 8  | 0  | 0.8107381  | x | x |
| EAL45958     | hypothetical protein                                                   | 1%  | 1%  | 1  | 2  | 0  | 0.6338474  | x | x |
| EAL47864     | hypothetical protein                                                   | 9%  | 9%  | 6  | 3  | 0  | 0.250709   | x | x |
| EAL45215     | hypothetical protein                                                   | 1%  | 1%  | 3  | 3  | 0  | 0.360227   | x | x |
| EAL50297     | Gal/GalNAc lectin heavy subunit                                        | 35% | 35% | 4  | 6  | 0  | 0.5052776  | x | ○ |
| EAL43139     | hypothetical protein                                                   | 0%  | 0%  | 0  | 0  | 0  | 0.3559177  | x | x |
| EAL48882     | hypothetical protein                                                   | 15% | 15% | 5  | 7  | 0  | 0.5279088  | x | ○ |
| EDS89128     | hypothetical protein                                                   | 3%  | 3%  | 1  | 1  | 0  | 0.4141496  | x | x |
| EAL50616     | hypothetical protein                                                   | 6%  | 6%  | 1  | 2  | 0  | 0.5553567  | x | ○ |

|           |                                                           |     |     |    |    |    |           |   |   |
|-----------|-----------------------------------------------------------|-----|-----|----|----|----|-----------|---|---|
| GAB45102  | phospholipid-transporting P-type ATPase                   | 1%  | 1%  | 1  | 1  | 0  | 0.6282226 | x | x |
| EAL50268  | hypothetical protein                                      | 0%  | 0%  | 0  | 1  | 0  | 0.559998  | x | x |
| EAL52048  | hypothetical protein                                      | 0%  | 0%  | 0  | 1  | 0  | 0.1989923 | x | x |
| EAL52049  | hypothetical protein                                      | 0%  | 1%  | 0  | 1  | 1  | 0.3559177 | x | x |
| EDS8939   | galactose-specific adhesin 170kD subunit                  | 2%  | 2%  | 1  | 0  | 1  | 0.2559177 | x | x |
| EAL49391  | Filopodin                                                 | 0%  | 1%  | 0  | 1  | 1  | 0.1694083 | x | x |
| EAL43982  | serine-threonine-isoleucine rich protein                  | 0%  | 1%  | 0  | 1  | 1  | 0.2285892 | x | x |
| EAL51553  | lysosyme                                                  | 13% | 14% | 3  | 6  | 1  | 0.542783  | x | O |
| EAL48725  | Fibrillin                                                 | 3%  | 3%  | 3  | 7  | 1  | 0.8619001 | x | x |
| EAL47684  | hypothetical protein                                      | 11% | 12% | 1  | 7  | 1  | 0.5264018 | x | O |
| EAL47890  | CPB2                                                      | 0%  | 1%  | 0  | 2  | 1  | 0.2559177 | x | x |
| EAL49854  | adenylyl cyclase-associated protein                       | 2%  | 3%  | 2  | 4  | 1  | 0.6390215 | x | x |
| EAL49416  | hypothetical protein                                      | 0%  | 1%  | 0  | 2  | 1  | 0.3559177 | x | x |
| EAL48775  | hypothetical protein                                      | 0%  | 1%  | 0  | 2  | 1  | 0.3559177 | x | x |
| EAL48984  | Grainin 1                                                 | 15% | 15% | 4  | 6  | 1  | 0.2670211 | x | x |
| EAL47171  | fatty acid elongase                                       | 3%  | 4%  | 1  | 5  | 1  | 0.7616924 | x | x |
| EAL48810  | hypothetical protein                                      | 20% | 23% | 7  | 6  | 1  | 0.2543235 | x | x |
| EAL50915  | Rho family GTPase                                         | 11% | 12% | 8  | 5  | 1  | 0.5130248 | x | x |
| EAL49058  | hypothetical protein                                      | 6%  | 7%  | 3  | 2  | 1  | 0.1265489 | x | x |
| EAL44222  | hypothetical protein                                      | 5%  | 6%  | 4  | 8  | 1  | 0.916027  | x | x |
| EAL48248  | dynamitin-like protein                                    | 1%  | 2%  | 2  | 2  | 1  | 0.916237  | x | x |
| EAL48877  | hypothetical protein                                      | 2%  | 3%  | 2  | 3  | 1  | 0.3489958 | x | x |
| EDS8955   | hypothetical protein                                      | 3%  | 5%  | 6  | 3  | 1  | 0.3631634 | x | x |
| EAL4866   | Alpha-adaptin gamma subunit isoform 1                     | 0%  | 1%  | 0  | 3  | 1  | 0.3559177 | x | x |
| EAL48792  | ribonuclease                                              | 4%  | 5%  | 4  | 6  | 1  | 0.5524987 | x | x |
| EAL50374  | hypothetical protein                                      | 7%  | 8%  | 3  | 2  | 1  | 1         | x | x |
| EDS8969   | Alpha adaptin beta subunit isoform b                      | 1%  | 2%  | 1  | 4  | 1  | 0.3472205 | x | x |
| EAL52203  | actin-like protein                                        | 7%  | 8%  | 4  | 8  | 1  | 0.325694  | x | x |
| EAL45064  | alpha-actinin NSF attachment protein                      | 2%  | 4%  | 3  | 5  | 2  | 0.6050176 | x | x |
| AAM21054  | postdyr-prolyl cis-trans isomerase                        | 40% | 41% | 12 | 7  | 2  | 0.1838986 | x | O |
| EAL49631  | actin binding protein                                     | 0%  | 2%  | 2  | 3  | 2  | 0.7714981 | x | x |
| EAL47130  | hypothetical protein                                      | 0%  | 2%  | 0  | 3  | 2  | 0.3559177 | x | x |
| EAL48658  | hypothetical protein                                      | 2%  | 4%  | 2  | 5  | 2  | 0.3631364 | x | x |
| EAL51874  | actin-related protein 2/3 complex subunit 1A              | 8%  | 9%  | 5  | 6  | 2  | 0.4277913 | x | x |
| EAL48708  | 20 kDa antigen                                            | 7%  | 8%  | 3  | 8  | 2  | 0.987181  | x | x |
| EDS89215  | hypothetical protein                                      | 2%  | 4%  | 0  | 2  | 2  | 0.1165017 | x | x |
| EDS89625  | serine-threonine-isoleucine rich protein                  | 1%  | 3%  | 1  | 2  | 2  | 0.0503183 | x | x |
| EAL43802  | serine carboxypeptidase (S28) family protein              | 13% | 14% | 2  | 4  | 2  | 0.4652331 | x | x |
| EAL48741  | papain family cysteine protease domain containing protein | 1%  | 3%  | 1  | 2  | 2  | 0.1869188 | x | O |
| EAL45887  | hypothetical protein                                      | 0%  | 2%  | 0  | 4  | 2  | 0.3559177 | x | x |
| XP_854460 | 80S ribosomal protein L5                                  | 0%  | 2%  | 2  | 4  | 2  | 0.6630463 | x | x |
| EAL51357  | glucose-inducible protein                                 | 0%  | 2%  | 0  | 5  | 2  | 0.3559177 | x | x |
| EAL48261  | hypothetical protein                                      | 29% | 32% | 12 | 28 | 3  | 0.467753  | x | O |
| EAL49954  | RabK family protein                                       | 0%  | 3%  | 0  | 6  | 3  | 0.3559177 | x | x |
| EAL44220  | hypothetical protein                                      | 5%  | 8%  | 2  | 3  | 3  | 0.4062022 | x | x |
| AAK62471  | Rab8                                                      | 18% | 21% | 5  | 3  | 3  | 0.2843749 | x | O |
| EAL4863   | hypothetical protein                                      | 8%  | 12% | 5  | 9  | 4  | 0.1688846 | x | x |
| EAL49303  | hypothetical protein                                      | 3%  | 5%  | 3  | 5  | 4  | 0.6631792 | x | x |
| EAL49302  | hypothetical protein                                      | 8%  | 10% | 7  | 9  | 4  | 0.5060782 | x | x |
| EAL42484  | Actin-related protein 3                                   | 6%  | 9%  | 6  | 9  | 4  | 0.4886645 | x | x |
| EAL51814  | calmodulin                                                | 5%  | 4%  | 0  | 8  | 4  | 0.3559177 | x | x |
| EAL48046  | hypothetical protein                                      | 0%  | 4%  | 0  | 5  | 4  | 0.157218  | x | x |
| EAL47078  | 80S ribosomal protein L9                                  | 0%  | 4%  | 0  | 5  | 4  | 0.1666612 | x | x |
| EAL48510  | beta-amylase                                              | 1%  | 5%  | 5  | 2  | 4  | 0.495323  | x | x |
| EAL43538  | Rax family GTPase                                         | 2%  | 7%  | 2  | 11 | 5  | 0.4351973 | x | x |
| EAL45280  | hypothetical protein                                      | 2%  | 7%  | 5  | 8  | 5  | 0.7864362 | x | x |
| EAL45400  | hypothetical protein                                      | 0%  | 5%  | 0  | 4  | 5  | 0.0393948 | O | x |
| EAL45446  | thioredoxin                                               | 5%  | 11% | 5  | 3  | 6  | 0.2114486 | x | x |
| EDS89794  | galactose-specific adhesin light subunit                  | 8%  | 16% | 4  | 2  | 7  | 0.0258209 | O | x |
| EAL47570  | hypothetical protein                                      | 2%  | 10% | 3  | 10 | 8  | 0.1290994 | x | x |
| Q24814    | Rho family GTPase                                         | 14% | 23% | 2  | 2  | 9  | 0.0042961 | O | O |
| EAL45900  | 80S ribosomal protein L38                                 | 0%  | 11% | 0  | 9  | 11 | 0.0540175 | x | x |

- 1: standard deviation was calculated using quadruplicate value from each strain
- 2: p-value was calculated using quadruplicate data sets of control strain and CPBFigs.
- 3: "O" indicates p-value equal to or less than 0.05, while "X" indicates p-value higher than 0.05.
- 4: "O" indicates that the protein was previously identified in [32].
