# Supplementary material
Source: PubMed Central journal article supplement (PMC3648001)
Supplement: IAI.00915-12_zii999090131so3.pdf [file IAI.00915-12_zii999090131so3.pdf]

Table S3. The list of proteins detected from phagosomes in our previous study<sup>[superscript 2]</sup>, but not in this study.

| Gen Bank ID | AmoebaDB gene ID | Function                                                        | HM-1 <sup>1</sup> | G3 <sup>1</sup> | 0min <sup>2</sup> | 30min <sup>2</sup> | 60min <sup>2</sup> | 120min <sup>2</sup> |
|-------------|------------------|-----------------------------------------------------------------|-------------------|-----------------|-------------------|--------------------|--------------------|---------------------|
| XP_649503   | EHI_135430       | Clathrin coat assembly protein, putative                        | 10.29             | 10.346          | +                 | ±                  | +                  | -                   |
| XP_650820   | EHI_158230       | Guanine nucleotide exchange factor                              | 3.344             | 3.413           | ±                 | -                  | ±                  | ±                   |
| XP_650878   | N/A              | hypothetical protein                                            | N/A               | N/A             | +                 | -                  | +                  | -                   |
| XP_651202   | EHI_169280       | Rab family GTPase                                               | 2.94              | 3.472           | +                 | +                  | +                  | +                   |
| XP_651793   | EHI_121880       | protein kinase domain containing protein                        | 8.484             | 8.501           | ±                 | -                  | ±                  | -                   |
| XP_651987   | EHI_078230       | phenylalanyl-tRNA synthetase alpha subunit, putative            | 8.984             | 7.462           | ±                 | ±                  | ±                  | -                   |
| XP_652660   | EHI_067220       | Rho family GTPase                                               | 2.689             | 2.521           | -                 | -                  | +                  | -                   |
| XP_652721   | EHI_048580       | hypothetical protein                                            | 11.316            | 11.483          | ±                 | ±                  | ±                  | -                   |
| XP_653593   | EHI_045550       | Rab family GTPase                                               | 6.471             | 6.636           | -                 | -                  | +                  | -                   |
| XP_654042   | EHI_137730       | ubiquitin carboxyl-terminal hydrolase domain containing protein | 3.165             | 2.934           | ±                 | -                  | ±                  | -                   |
| XP_654364   | EHI_054830       | Plasma membrane calcium-transporting ATPase, putative           | 9.887             | 9.832           | ±                 | -                  | +                  | -                   |
| XP_654566   | EHI_092140       | vesicular transport protein Yip1, putative                      | 9.051             | 9.086           | +                 | -                  | ±                  | -                   |
| XP_654571   | EHI_092190       | fatty acid elongase, putative                                   | 3.922             | 3.999           | -                 | ±                  | ±                  | -                   |
| XP_654644   | EHI_141850       | hypothetical protein                                            | 7.319             | 7.112           | -                 | ±                  | ±                  | -                   |
| XP_654829   | EHI_010340       | EhCP-C10                                                        | 8.372             | 8.244           | +                 | ±                  | +                  | -                   |
| XP_655057   | EHI_014140       | hypothetical protein                                            | 4.293             | 4.135           | ±                 | -                  | ±                  | -                   |
| XP_655179   | EHI_083410       | ubiquitin, putative                                             | 9.938             | 10.101          | +                 | +                  | +                  | -                   |
| XP_655217   | EHI_164810       | Adapter-related protein complex 3 (AP-3) subunit, putative      | 9.697             | 9.613           | ±                 | ±                  | ±                  | -                   |
| XP_655299   | EHI_069320       | C2 domain containing protein                                    | 2.292             | 2.369           | +                 | +                  | +                  | +                   |
| XP_655788   | EHI_155540       | hypothetical protein, conserved                                 | 5.967             | 6.006           | -                 | ±                  | ±                  | -                   |
| XP_655822   | EHI_150430       | villidin, putative                                              | 8.001             | 8.066           | -                 | ±                  | ±                  | ±                   |
| XP_655896   | EHI_012330       | serine-threonine-isoleucine rich protein, putative              | 2.582             | 8.651           | ±                 | ±                  | ±                  | ±                   |
| XP_655921   | EHI_177510       | Rab X17                                                         | 5.565             | 4.551           | ±                 | ±                  | +                  | ±                   |
| XP_656184   | EHI_012240       | Rho family GTPase                                               | 10.231            | 10.26           | ±                 | -                  | +                  | -                   |
| XP_656406   | EHI_153100       | alpha-amylase, putative                                         | 8.237             | 8.168           | ±                 | -                  | ±                  | -                   |
| XP_656436   | EHI_186850       | PIWI domain protein                                             | 3.451             | 3.401           | +                 | +                  | +                  | +                   |
| XP_656762   | EHI_068090       | serine carboxypeptidase (S28) family protein                    | 6.868             | 6.482           | +                 | ±                  | +                  | +                   |
| XP_656918   | EHI_096420       | LIM zinc finger domain containing protein                       | 11.371            | 11.592          | +                 | -                  | +                  | +                   |
| XP_657056   | EHI_110440       | hypothetical protein                                            | 3.972             | 3.974           | -                 | -                  | ±                  | ±                   |
| XP_657106   | EHI_009850       | hypothetical protein                                            | 6.385             | 6.619           | -                 | -                  | ±                  | -                   |
| XP_657273   | EHI_093970       | hypothetical protein                                            | 8.66              | 8.25            | +                 | +                  | +                  | +                   |

<sup>1</sup> RMA Normalized Values (log base 2) data were extracted from amoebaDB(<http://amoebadb.org/amoeba/>)

<sup>2</sup> Proteins with the peptide coverage of >5%, 0.1–5%, or undetected at each time points are marked with "+", "±", "-", respectively from reference 32 in the (Reprinted from (Okada M, Huston CD, Oue M, Mann BJ, Petri Jr. WA, Kita K, Nozaki T. 2006. Kinetics and strain variation of phagosome proteins of *histolytica* by proteomic analysis. Mol. Biochem. Parasitol. 145:171-183, 2006, with permission from Elsevier.))
