# Supplementary material
Source: PubMed Central journal article supplement (PMC3648001)
Supplement: IAI.00915-12_zii999090131so4.pdf [file IAI.00915-12_zii999090131so4.pdf]

Table S4. The list of proteins detected from phagosomes only in this study, but not in our previous study (32).

| ID number                              | Function                                                                               |
|----------------------------------------|----------------------------------------------------------------------------------------|
| Rab_Vesicular trafficking, other small | GTPase, and effectors                                                                  |
| EHL_040310                             | EAL43520 Rab family GTPase                                                             |
| EHL_046390                             | EAL43948 Rab family GTPase                                                             |
| EHL_082230                             | EAL46537 Rab family GTPase                                                             |
| EHL_177520                             | EAL50536 Rab family GTPase                                                             |
| EHL_004380                             | EAL46866 Rab family GTPase                                                             |
| EHL_005460                             | EAL42562 Rab family GTPase                                                             |
| EHL_042250                             | EAL51150 Rab family GTPase                                                             |
| EHL_068230                             | EAL46354 Rab family GTPase                                                             |
| EHL_067850                             | EAL51401 Rab family GTPase                                                             |
| EHL_056100                             | EAL47212 Rab family GTPase                                                             |
| EHL_117960                             | EAL50676 Rab family GTPase                                                             |
| EHL_012380                             | EAL49954 Rab family GTPase                                                             |
| EHL_073440                             | EAL51294 small GTPase ArfB1                                                            |
| EHL_164900                             | EAL49821 small GTPase EhRabD2                                                          |
| EHL_059670                             | small GTPase RabD1                                                                     |
|                                        | AAA29114 Ras-like GTP-binding protein RHO1                                             |
| EHL_180430                             | EAL48426 Rho family GTPase                                                             |
| EHL_178680                             | EAL50872 Rho family GTPase                                                             |
| EHL_013260                             | EAL50915 Rho family GTPase                                                             |
| EHL_005910                             | EAL48058 Rho guanine nucleotide exchange factor                                        |
| EHL_182930                             | EAL49773 RhoGAP domain containing protein                                              |
| EHL_180430                             | EAL48426 Rho family GTPase                                                             |
| EHL_013260                             | EAL50915 Rho family GTPase                                                             |
| EHL_051820                             | EAL48002 protein with RhoGEF and ArfGAP domains                                        |
| EHL_140140                             | EAL51357 gtpase activating protein                                                     |
| EHL_194500                             | EAL49302 ADP-ribosylation factor                                                       |
| EHL_148190                             | EAL52137 Ran family GTPase                                                             |
|                                        | XP_001913620 Ras-1                                                                     |
| EHL_004860                             | EAL45317 Ras family GTPase                                                             |
| EHL_137700                             | EAL48653 Ras family GTPase                                                             |
| EHL_196530                             | EAL43536 Ras family GTPase                                                             |
| EHL_035800                             | EAL50768 Ras GTPase activating protein                                                 |
| EHL_139030                             | EAL43134 Ayrntaxin                                                                     |
| EHL_093130                             | EAL42694 Ayrntaxin binding protein                                                     |
| EHL_013040                             | EDS89698 Alpha_adaptin beta subunit isoform b                                          |
| EHL_196890                             | EAL44666 Alpha_adaptin gamma subunit isoform 1                                         |
| EHL_093860                             | EAL51906 MIT domain protein                                                            |
| EHL_170040                             | EAL50601 Longin-type vesicle-associated membrane protein                               |
| EHL_052740                             | EAL46248 Dynamin-like protein                                                          |
| EHL_140350                             | EAL48350 Guanine nucleotide-binding protein alpha-16 subunit [Entamoeba dispar SAW760] |
| EHL_000240                             | EAL47361 Guanine nucleotide-binding protein subunit beta                               |
| EHL_064680                             | EAL45804 alpha-soluble NSF attachment protein                                          |
| EHL_152680                             | EAL50295 EH-domain containing protein                                                  |
| EHL_069950                             | EAL43400 C2 domain containing protein                                                  |
| EHL_060380                             | EAL47854 Grainin                                                                       |
|                                        | EDS89207 Grainin                                                                       |
| EHL_167300                             | EAL44984 Grainin 1                                                                     |
| EHL_167310                             | EAL44970 Grainin 2                                                                     |
| EHL_169820                             | EAL50624 SNF7 family protein                                                           |
| EHL_194400                             | EAL49310 SNF7 family protein                                                           |
| EHL_038590                             | EAL51498 EhEmp24D                                                                      |
| EHL_067870                             | EAL51399 Ras GTPase-activating protein                                                 |
| EHL_137920                             | EAL48673 MIG-14 Wnt-binding factor                                                     |
| EHL_139040                             | EAL43129 MIG-14 Wnt-binding factor                                                     |
| EHL_105210                             | EAL48544 The F-BAR domain containing protein                                           |
| Enzymes                                |                                                                                        |
| EHL_150490                             | EAL46914 Alcohol dehydrogenase                                                         |
| EHL_198760                             | EAL49788 Alcohol dehydrogenase                                                         |
| EHL_125950                             | EAL45033 Alcohol dehydrogenase                                                         |
| EHL_152880                             | EAL50314 Alpha-amylase family protein                                                  |
| EHL_192590                             | EAL48510 Beta-amylase                                                                  |
| EHL_012010                             | EAL50824 Beta-N-acetylhexosaminidase                                                   |
| EHL_039610                             | EAL43609 Cysteine proteinase                                                           |
| EHL_182720                             | EAL43030 Dipeptidyl-peptidase                                                          |
| EHL_087570                             | EAL45971 Endoribonuclease L-PSP                                                        |
| EHL_044370                             | EAL46995 Gamma-amylase                                                                 |
| EHL_169300                             | EAL45818 Ribonuclease                                                                  |
| EHL_127160                             | EAL48792 Ribonuclease                                                                  |
| EHL_176820                             | EAL44451 N-acetylmuraminidase                                                          |
| EHL_098570                             | EAL44987 Fructose-1                                                                    |
| EHL_052770                             | EAL46247 Glucosidase II alpha subunit                                                  |
| EHL_187020                             | EAL48973 Glycerdehyde-3-phosphate dehydrogenase                                        |
| EHL_165070                             | EAL46832 Short chain dehydrogenase family protein                                      |
| EHL_185280                             | EAL43285 Phosphoglucomutase/phosphomannomutase family protein                          |
| EHL_076870                             | EAL49536 Steroid 5-alpha reductase                                                     |
| EHL_037190                             | EAL43602 Serine carboxypeptidase (S28) family protein                                  |
| EHL_096280                             | EAL51525 Endo-1,4-beta-xylanase                                                        |
| EHL_101240                             | EAL51626 Nuclease domain-containing protein                                            |
| EHL_114320                             | EAL43471 Phospholipase B                                                               |
| EHL_130700                             | EAL43773 Enolase                                                                       |
| EHL_158240                             | EAL44771 Fatty acid elongase                                                           |
| EHL_163540                             | EAL44582 beta-Keto acyl reductase                                                      |
| EHL_026340                             | EAL49998 Thioredoxin                                                                   |
| EHL_021560                             | EAL44614 Thioredoxin                                                                   |
| EHL_110350                             | EAL51634 Thioredoxin                                                                   |
| EHL_170420                             | EAL45646 Thioredoxin                                                                   |
| EHL_061980                             | EAL43136 Peroxiredoxin                                                                 |
| EHL_056480                             | EAL45339 Triosephosphate isomerase                                                     |
| EHL_165350                             | EAL44379 Malate dehydrogenase                                                          |
| EHL_044970                             | EAL43201 Malic enzyme                                                                  |
| EHL_128100                             | EAL42895 Peptidyl-prolyl cis-trans isomerase                                           |
| EHL_071590                             | EAL45264 Protein disulfide isomerase                                                   |
| EHL_009530                             | EAL51884 Pyruvate phosphate dikinase                                                   |
| EHL_051060                             | EAL51636 Pyruvate:ferredoxin oxidoreductase                                            |
| EHL_099180                             | EAL48899 Lecithin:cholesterol acyltransferase                                          |
| EHL_020250                             | EAL43804 Lecithin:cholesterol acyltransferase domain-containing protein                |
| EHL_151800                             | EAL52013 Ganglioside gm2 activator protein                                             |
| EHL_178960                             | EAL50904 Acetyl-CoA synthetase                                                         |
| EHL_096710                             | EAL51565 Type A flavoprotein                                                           |
| EHL_098800                             | EAL47130 NAD-dependent epimerase/dehydratase family protein                            |
| Cytoskeletal proteins                  |                                                                                        |
| EHL_008780                             | EAL47592 Actin                                                                         |
| EHL_104390                             | EAL49631 Actin binding protein                                                         |
| EHL_168340                             | EAL45540 Actin binding protein                                                         |
|                                        | AF208390 Actinin-like protein                                                          |
| EHL_111050                             | EAL52203 Actin-like protein                                                            |

|                              |          |                                                                        |
|------------------------------|----------|------------------------------------------------------------------------|
| EHI_045000                   | EAL51874 | Actin-related protein 2/3 complex subunit 1A                           |
| EHI_198930                   | EAL42484 | Actin-related protein 3                                                |
| EHI_152660                   | EAL43181 | ARP2/3 complex 20 kDa subunit                                          |
| EHI_174910                   | EAL47955 | ARP2/3 complex 21 kDa subunit                                          |
| EHI_091250                   | EAL45183 | ARP2/3 complex 34 kDa subunit                                          |
| EHI_110180                   | EAL51645 | Myosin heavy chain                                                     |
| EHI_005020                   | EAL47477 | F-actin capping protein beta subunit                                   |
| EHI_197480                   | EAL46302 | Actophorin                                                             |
| EHI_140260                   | EAL51366 | Copine                                                                 |
| EHI_137110                   | EAL47201 | Copine                                                                 |
| EHI_103430                   | EAL47035 | Cortaxillin II                                                         |
| EHI_104630                   | EAL51888 | Filamin 2                                                              |
| EHI_167130                   | EAL49391 | Filopodin                                                              |
| EHI_025450                   | EAL47570 | LIM zinc finger domain containing protein                              |
| EHI_007640                   | EAL49416 | alpha-actinin                                                          |
| EHI_107030                   | EAL45274 | WASH complex subunit 7-like                                            |
| Lectins and surface proteins |          |                                                                        |
| EHI_077500                   | EAL50029 | Galactose-specific adhesin 170kD subunit                               |
| EHI_042370                   | EDS88899 | Galactose-specific adhesin 170kD subunit                               |
| EHI_049690                   | EDS89794 | Galactose-specific adhesin 35kD subunit                                |
| EHI_181220                   | EAL47615 | Adhesin 112 (EhADH112)                                                 |
| EHI_057670                   | EAL46708 | 20 kDa antigen                                                         |
| EHI_199000                   | EAL47897 | Calponin homology domain protein                                       |
| EHI_012330                   | EAL50843 | Serine-threonine-isoleucine rich protein                               |
| EHI_025700                   | EAL43982 | Serine-threonine-isoleucine rich protein                               |
|                              | EDS89625 | Serine-threonine-isoleucine rich protein                               |
| EHI_073580                   | EAL48580 | Leucine-rich repeat containing protein                                 |
| EHI_177990                   | EAL46102 | Leucine-rich repeat containing protein                                 |
| Transporter proteins         |          |                                                                        |
| EHI_092600                   | EAL45296 | Vacuolar ATP synthase subunit C                                        |
| EHI_106350                   | EAL46129 | Vacuolar ATP synthase subunit d                                        |
| EHI_074020                   | EAL48176 | Vacuolar proton ATPase subunit                                         |
| EHI_118900                   | EAL48719 | Vacuolar sorting protein VPS4                                          |
| EHI_004640                   | EAL51407 | Vesicle-fusing ATPase                                                  |
| EHI_189850                   | EAL50652 | V-type ATPase                                                          |
| EHI_043010                   | EAL47239 | V-type ATPase                                                          |
| EHI_054830                   | EAL45901 | Putative plasma membrane calcium ion-transporting ATPase               |
| EHI_168260                   | EAL45549 | Phospholipid-transporting P-type ATPase                                |
| EHI_199020                   | EAL47899 | High-affinity potassium uptake transporter                             |
|                              | AAU43735 | Sec61 alpha subunit                                                    |
| EHI_156240                   | EAL47525 | Competence protein ComEC                                               |
| EHI_101230                   | EAL51212 | P-glycoprotein 6                                                       |
| EHI_055400                   | EDS89128 | NAD(P) transhydrogenase (AB-specific), alpha subunit                   |
| CPBFs                        |          |                                                                        |
| EHI_087660                   | EAL47890 | CPBF2                                                                  |
| EHI_040440                   | EAL43975 | CPBF7                                                                  |
| kinase and phosphatase       |          |                                                                        |
| EHI_095940                   | EAL49497 | Protein kinase                                                         |
| EHI_174100                   | EAL47106 | Protein kinase                                                         |
| EHI_118810                   | EAL48728 | Protein kinase domain containing protein                               |
| EHI_201080                   | EAL44647 | Protein kinase domain containing protein                               |
| EHI_179330                   | EAL45606 | Protein phosphatase family protein                                     |
| EHI_049430                   | EAL50487 | Protein tyrosine phosphatase                                           |
| EHI_037140                   | EAL43605 | Receptor protein kinase                                                |
| EHI_098560                   | EAL50580 | Hexokinase                                                             |
| EHI_186990                   | EAL51036 | Tyrosine kinase                                                        |
| EHI_195050                   | EAL50563 | Tyrosine kinase                                                        |
| EHI_061870                   | EAL43139 | Protein serine/threonine kinase                                        |
| chaperon                     |          |                                                                        |
| EHI_136160                   | EAL49855 | Calreticulin                                                           |
| EHI_052860                   | EAL45068 | Heat shock protein 70                                                  |
| EHI_199590                   | EAL49351 | 70 kDa heat shock protein                                              |
| EHI_163480                   | EAL44584 | 90 kDa heat shock protein                                              |
| Translation                  |          |                                                                        |
| EHI_056380                   | EAL45348 | enhancer binding protein 2 (EBP2)                                      |
| EHI_182670                   | EAL43716 | enhancer binding protein-2                                             |
| EHI_073600                   | EAL44974 | 40S ribosomal protein S15a                                             |
| EHI_099790                   | EAL45900 | 60S ribosomal protein L38                                              |
| EHI_068660                   | EAL49070 | 60S ribosomal protein L5                                               |
| EHI_126140                   | EAL47076 | 60S ribosomal protein L9                                               |
| EHI_102170                   | EAL42972 | Elongation factor 1-alpha 1                                            |
| EHI_189490                   | EAL45623 | Elongation factor 2                                                    |
| EHI_060740                   | EAL42646 | URE3-BP sequence specific DNA binding protein                          |
| EHI_118840                   | EAL48725 | Fibrillarin                                                            |
| Signal transduction          |          |                                                                        |
| EHI_136150                   | EAL49854 | Adenylyl cyclase-associated protein                                    |
|                              | EDS89370 | Adenylyl cyclase-associated protein                                    |
| EHI_167290                   | EAL44972 | Leucine rich repeat / protein phosphatase 2C domain containing protein |
| EHI_187770                   | EAL50633 | SH3 domain protein                                                     |
| EHI_055350                   | EDS89126 | SH3 domain protein                                                     |
| EHI_006810                   | EAL49075 | 14-3-3 protein 3                                                       |
| Cytokinesis                  |          |                                                                        |
| EHI_118260                   | EAL50648 | Diaphanous protein                                                     |
|                              | AF238235 | Diaphanous protein                                                     |
| EHI_151250                   | EAL52042 | Dedicator of cytokinesis domain containing protein, putative           |
| EHI_170180                   | EAL50587 | Dedicator of cytokinesis domain containing protein                     |
| Proteasome                   |          |                                                                        |
| EHI_083410                   | EAL44777 | Ubiquitin                                                              |
| Multi function               |          |                                                                        |
| EHI_044820                   | EAL51814 | Calmodulin                                                             |
| EHI_016120                   | EAL51029 | EF-hand calcium-binding domain containing protein                      |
| EHI_118620                   | EAL48747 | HEAT repeat domain containing protein                                  |
| EHI_168370                   | EAL45537 | WD domain containing protein                                           |
| EHI_187220                   | EAL51082 | WD domain containing protein                                           |
| EHI_142190                   | EAL50656 | WD repeat protein                                                      |
| EHI_178560                   | EAL46658 | Lipid-binding START domain                                             |
| Unknown function protein     |          |                                                                        |
| EHI_098210                   | EAL48243 | Lysine and glutamic acid-rich protein 1 (KERP1)                        |
| EHI_143820                   | EAL45040 | Hypothetical protein, DUF848 superfamily protein                       |
| EHI_057700                   | EAL46705 | Hypothetical protein, DUF1632 superfamily protein                      |
| EHI_148020                   | EAL52155 | Protein FAM18B, putative                                               |
| EHI_001100                   | EAL44491 | Hypothetical protein                                                   |
| EHI_004370                   | EAL46867 | Hypothetical protein                                                   |
| EHI_004880                   | EAL45315 | Hypothetical protein                                                   |
| EHI_005960                   | EAL48032 | Hypothetical protein                                                   |
| EHI_007000                   | EAL49058 | Hypothetical protein                                                   |
| EHI_007010                   | EAL49057 | Hypothetical protein                                                   |
| EHI_010340                   | EAL49414 | Hypothetical protein                                                   |
| EHI_010510                   | EAL44683 | Hypothetical protein                                                   |
| EHI_013240                   | EAL50928 | Hypothetical protein                                                   |

|            |          |                      |
|------------|----------|----------------------|
| EHI_014400 | EAL49699 | Hypothetical protein |
| EHI_015420 | EDS89560 | Hypothetical protein |
| EHI_016410 | EAL48132 | Hypothetical protein |
| EHI_017000 | EAL45851 | Hypothetical protein |
| EHI_017560 | EAL46860 | Hypothetical protein |
| EHI_017690 | EAL45400 | Hypothetical protein |
| EHI_020350 | EAL49200 | Hypothetical protein |
| EHI_022890 | EAL48097 | Hypothetical protein |
| EHI_030410 | EAL44431 | Hypothetical protein |
| EHI_031950 | EAL43613 | Hypothetical protein |
| EHI_035510 | EAL50740 | Hypothetical protein |
| EHI_044360 | EAL46996 | Hypothetical protein |
| EHI_047620 | EAL47863 | Hypothetical protein |
| EHI_047630 | EDS88796 | Hypothetical protein |
| EHI_047800 | EAL45215 | Hypothetical protein |
| EHI_049350 | EAL50479 | Hypothetical protein |
| EHI_050800 | EAL43167 | Hypothetical protein |
| EHI_054480 | EAL46698 | Hypothetical protein |
| EHI_056400 | EAL45346 | Hypothetical protein |
| EHI_058920 | EAL45867 | Hypothetical protein |
| EHI_060440 | EDS89309 | Hypothetical protein |
| EHI_066300 | EAL46861 | Hypothetical protein |
| EHI_067090 | EAL43464 | Hypothetical protein |
| EHI_068480 | EAL48772 | Hypothetical protein |
| EHI_068510 | EAL48775 | Hypothetical protein |
| EHI_069270 | EAL49915 | Hypothetical protein |
| EHI_069510 | EAL45499 | Hypothetical protein |
| EHI_073160 | EDS88858 | Hypothetical protein |
| EHI_077530 | EAL44160 | Hypothetical protein |
| EHI_083100 | EDS89284 | Hypothetical protein |
| EHI_083110 | EAL42697 | Hypothetical protein |
| EHI_083140 | EDS89285 | Hypothetical protein |
| EHI_083600 | EAL49028 | Hypothetical protein |
| EHI_085720 | EDS88984 | Hypothetical protein |
| EHI_087740 | EAL50553 | Hypothetical protein |
| EHI_091090 | EAL45178 | Hypothetical protein |
| EHI_092680 | EDS89778 | Hypothetical protein |
| EHI_093970 | EAL51170 | Hypothetical protein |
| EHI_096410 | EAL51539 | Hypothetical protein |
| EHI_097870 | EAL47848 | Hypothetical protein |
| EHI_098000 | EAL45671 | Hypothetical protein |
| EHI_103860 | EAL47964 | Hypothetical protein |
| EHI_104450 | EAL49625 | Hypothetical protein |
| EHI_104740 | EAL45200 | Hypothetical protein |
| EHI_107090 | EAL45280 | Hypothetical protein |
| EHI_107300 | EAL47395 | Hypothetical protein |
| EHI_108730 | EAL45958 | Hypothetical protein |
| EHI_109990 | EAL46810 | Hypothetical protein |
| EHI_116720 | EAL44046 | Hypothetical protein |
| EHI_117690 | EDS89335 | Hypothetical protein |
| EHI_118070 | EAL50665 | Hypothetical protein |
| EHI_120590 | EAL46589 | Hypothetical protein |
| EHI_142960 | EAL45091 | Hypothetical protein |
| EHI_151280 | EAL52048 | Hypothetical protein |
| EHI_151580 | EAL51958 | Hypothetical protein |
| EHI_153160 | EAL51014 | Hypothetical protein |
| EHI_155310 | EAL50374 | Hypothetical protein |
| EHI_155560 | EAL50400 | Hypothetical protein |
| EHI_158120 | EAL45423 | Hypothetical protein |
| EHI_160980 | EAL43848 | Hypothetical protein |
| EHI_161040 | EAL44222 | Hypothetical protein |
| EHI_161070 | EAL44220 | Hypothetical protein |
| EHI_163600 | EAL48332 | Hypothetical protein |
| EHI_165770 | EAL48913 | Hypothetical protein |
| EHI_167660 | EAL50171 | Hypothetical protein |
| EHI_170000 | EAL50606 | Hypothetical protein |
| EHI_173440 | EAL43749 | Hypothetical protein |
| EHI_174140 | EAL47110 | Hypothetical protein |
| EHI_182570 | EAL51316 | Hypothetical protein |
| EHI_182770 | EAL50093 | Hypothetical protein |
| EHI_185450 | EDS89215 | Hypothetical protein |
| EHI_194490 | EAL48303 | Hypothetical protein |
| EHI_195140 | EAL48457 | Hypothetical protein |
