# Supplementary material
Source: PubMed Central journal article supplement (PMC3648001)
Supplement: IAI.00915-12_zii999090131so5.pdf [file IAI.00915-12_zii999090131so5.pdf]

Table S5. The list of proteins detected from phagosomes in both our previous [superscript 1] and present studies.

| ID number                                                     |                         | Function                                                          |
|---------------------------------------------------------------|-------------------------|-------------------------------------------------------------------|
| Rab, Vesicular trafficking, other small GTPase, and effectors |                         |                                                                   |
| EHI_108610                                                    | XP_651336               | Rab1                                                              |
| EHI_026420                                                    | XP_655377               | Rab5                                                              |
| EHI_192810                                                    | XP_649196               | Rab7A                                                             |
| EHI_081330                                                    | XP_656820               | Rab7B                                                             |
| EHI_082070                                                    | XP_651915               | Rab7D                                                             |
| EHI_199820                                                    | XP_653051               | Rab8                                                              |
| EHI_107250                                                    | XP_652776               | Rab11B                                                            |
| EHI_161030                                                    | XP_649609               | Rab11C                                                            |
| EHI_153690                                                    | XP_656355               | RabC1                                                             |
| EHI_143650                                                    | XP_652352               | RabC3                                                             |
| EHI_105270                                                    | XP_653938               | Receptor mediated endocytosis protein 1                           |
| EHI_072110                                                    | XP_653455               | Ras guanine nucleotide exchange factor                            |
| EHI_058090                                                    | XP_651163               | Rap2                                                              |
| EHI_021410                                                    | XP_650755               | Syntaxin16                                                        |
| Hydrolytic enzymes                                            |                         |                                                                   |
| EHI_074180                                                    | XP_650156               | Cysteine protease A1                                              |
| EHI_033710                                                    | XP_650642               | Cysteine protease A2                                              |
| EHI_050570                                                    | XP_656602               | Cysteine protease A4                                              |
| EHI_168240                                                    | XP_650937               | Cysteine protease A5                                              |
| EHI_152220                                                    | XP_655800               | Cysteine protease C4                                              |
| EHI_127030                                                    | XP_651553               | Cysteine protease C6                                              |
| EHI_054530                                                    | XP_652089               | Serine protease                                                   |
| EHI_200230                                                    | XP_655394               | Surface protease                                                  |
| EHI_138460                                                    | XP_655128               | Papain family cysteine protease domain containing protein         |
| EHI_199110                                                    | XP_653294               | Lysozyme 1                                                        |
| EHI_096570                                                    | XP_656933               | Lysozyme 2                                                        |
| EHI_007330                                                    | XP_650273               | $\beta$ -Hexosaminidase B                                         |
| EHI_023360                                                    | XP_655636               | $\alpha$ -Amylase                                                 |
| EHI_069560                                                    | XP_650881               | Glucosidase II beta subunit-like protein                          |
| EHI_146950                                                    | XP_649718               | Acid phosphatase                                                  |
| EHI_136440                                                    | XP_655222               | Dipeptidyl aminopeptidase                                         |
| EHI_039860                                                    | XP_651963               | Acid phosphatase                                                  |
| EHI_136400                                                    | XP_655259               | Phospholipase A2                                                  |
| EHI_097630                                                    | XP_649424               | Phospholipase B                                                   |
| EHI_118820                                                    | XP_654113               | Phospholipase B                                                   |
| EHI_007930                                                    | XP_654368               | $\beta$ -galactosidase                                            |
| EHI_010710                                                    | XP_653059               | $\beta$ -galactosidase                                            |
| Cytoskeletal proteins                                         |                         |                                                                   |
| EHI_159150                                                    | XP_656738               | Actin                                                             |
| EHI_080740                                                    | XP_654303               | Talin                                                             |
| EHI_181250                                                    | XP_652995               | RacA                                                              |
| EHI_070730                                                    | XP_652693               | RacC                                                              |
| EHI_129750                                                    | XP_651800               | RacG                                                              |
| EHI_016130                                                    | XP_656416               | Arp2/3 complex-activating protein rickA                           |
| Lectins and surface proteins                                  |                         |                                                                   |
| EHI_096320                                                    | XP_656907               | Mannose 6-phosphate receptor                                      |
| EHI_100320                                                    | XP_651702               | Multidrug resistant protein 2                                     |
| EHI_012270                                                    | XP_656181               | Gal/GalNAc lectin Hgl1                                            |
| EHI_006980<br>/<br>EHI_065330                                 | XP_654447/<br>XP_652394 | Gal/GalNAc lectin Ig1,2                                           |
| EHI_035690<br>/<br>EHI_148790                                 | XP_656145/<br>XP_657460 | Gal/GalNAc lectin Lgl1-5                                          |
| EHI_015380                                                    | XP_654508               | Immunodominant variable surface antigen                           |
| EHI_065710                                                    | XP_653647               | Predicted wall-associated receptor kinase 4-like                  |
| Transporter proteins                                          |                         |                                                                   |
| EHI_014030                                                    | XP_001913541            | Nicotinamide nucleotide transhydrogenase                          |
| EHI_016480                                                    | XP_653525               | Calcium transporting ATPase                                       |
| EHI_169580                                                    | XP_650374               | Nucleoside transporter                                            |
| EHI_169900                                                    | XP_656001               | Nucleoside transporter                                            |
| EHI_131130                                                    | XP_655525               | Multidrug resistance efflux transporter                           |
| EHI_006940                                                    | XP_654451               | Drug/Metabolite Transporter (DMT) Superfamily                     |
| EHI_008120                                                    | XP_654389               | Facilitated trehalose transporter Tret1-like                      |
| EHI_024530                                                    | XP_652282               | Cysteine/glutathione ABC transporter membrane/ATP-binding protein |
| EHI_110000                                                    | XP_652195               | Exportin-7                                                        |

| CPBFs                    |           |                               |
|--------------------------|-----------|-------------------------------|
| EHI_164800               | XP_655218 | CPBF1                         |
| EHI_178470               | XP_653036 | CPBF6                         |
| EHI_059830               | XP_652899 | CPBF8                         |
| Other proteins           |           |                               |
| EHI_096790               | XP_655670 | Copine                        |
| EHI_119950               | XP_649932 | Rsu-1                         |
| EHI_163260               | XP_647967 | Copine 1                      |
| EHI_125840               | XP_656494 | Cyclophilin                   |
| EHI_011210               | XP_651869 | Elongation factor 1           |
| EHI_131000               | XP_655512 | Zinc finger protein           |
| EHI_050520               | XP_656607 | Lipoyl synthase               |
| Unknown function protein |           |                               |
| EHI_098510               | XP_656027 | No homolog in other organisms |

1 Reprinted from (Okada M, Huston CD, Oue M, Mann BJ, Petri Jr. WA, Kita K, Nozaki T. 2006. Kinetics and strain variation of phagosome proteins of *Entamoeba histolytica* by proteomic analysis. *Mol. Biochem. Parasitol.* 145:171-183, 2006, with permission from Elsevier.).
